# Supplementary material
Source: Royal Society of Chemistry journal article supplement (doi:10.1039/d5cs01430a)
Supplement: d5cs01430a1.xlsx [file d5cs01430a1.xlsx]

## Sheet: References
Ref.	Calculational method	method(opt-DFT)	basis set (opt-DFT-metal)	method(sp-DFT)	basis set (sp-DFT-metal)	Relativistic effects	method(opt-MCSCF)	basis set (opt-MCSCF-metal)	method(sp-MCSCF)	basis set (sp-MCSCF-metal)
ACS Catal. 2020, 10, 1−6	Ground-state optimization: DFT: UB3LYP/cc-pVDZ. Excited-state optimization: SA-CASSCF. Excited-state energy: MS-CASPT2, DLPNO--CCSD(T)	B3LYP	cc-pVDZ	\	\						As the first theoretical study on the reactivity of electronically excited NiII, this work unveils the potential of the multireference method to tackle intriguing mechanistic puzzles in the emerging frontier of the excited-state chemistry involving the first-row transition metals
J. Am. Chem. Soc. 2021, 143, 19406−19416	CASPT2//CASSCF computation based on DFT(B3LYP)-opted structures	B3LYP	\	\	\
J. Am. Chem. Soc. 2022, 144, 14607−14613	Ground strate structure: DFT method of UB3LYP functional combined with cc-pV(D+d)Z basis set for P atom and cc-pVDZ basis set for other atoms (abbreviated as VDZ). The excited triplet states molecular geometries for minima were optimized by using (SA-CASSCF) method (with equal weights for all states) in gas phase employing VDZ basis set. The calculations of triplet state excitation energies were …	B3LYP	cc-pVDZ	\	\
Organometallics 2011, 30, 4687–4694	BS-B3LYP/cc-PVTZ(Co)-6-311+G(d,p)(C,H,N)	B3LYP	cc-pVTZ	\	\
Organometallics 2019, 38, 3582−3589	According to the results of these benchmarking studies, we have decided to employ B3LYP-D3, B3LYP, B97D, OPBE, and ωB97XD functionals in the present study; The def2-SVPP and def2-TZVPP basis sets were used in our DFT calculations.	B3LYP	def2-SVPP	\	\
J. Am. Chem. Soc. 2021, 143, 5324−5329	DFT: B3LYP-D3(BJ)/def2-TZVP(Fe, atoms attached to Fe)-SVP	B3LYP	def2-TZVP	\	\
J. Am. Chem. Soc. 2022, 144, 2637−2656	B3LYP/def2-TZVP	B3LYP	def2-TZVP	\	\
J. Phys. Chem. Lett. 2022, 13, 4058−4063	B3LYP-D3/6-311+G(d) (N, O, H) + aug-cc-pVTZ (B) + def2-TZVPD (Nb) + SDD (Au) CASSCF-DKH2/DKH-def2-TZVP (H, B, N, O) + old-DKH-TZVP (Nb) + SARC-DKH-TZVP (Au)	B3LYP	def2-TZVPD (Nb) //SDD (Au)	\	\						The complete active space self-consistent field (CASSCF(12,12)) wave function combined with Douglas-Kroll-Hess 2nd order scalar relativistic (DKH2) correction22–25 was used to calculate the spin-orbit coupling (SOC) constant at the minimum energy crossing point (MECP).
Journal of Organometallic Chemistry 748 (2013) 51e55	DFT: B3LYP-D3/LAVCP*/PBF	B3LYP	LACVP*	\	\
Journal of Catalysis 376 (2019) 146–149	UB3LYP/LAN2DZ(Sb,Mn,W)-6-31G(d,p)(H, O bound to Mn)-6-31G(remaining O)	B3LYP	LANL2DZ	\	\
Computational and Theoretical Chemistry 1155 (2019) 31–37	DFT：B3LYP/6-311++G(3df,3pd) for C,H; SDD for Nb; Multi-reference：MRCI+Q uses the same basis set as DFT to verify the accuracy of DFT results	B3LYP	SDD	\	\		MRCI+Q	SDD
Chem. Sci., 2012, 3, 1600	Geometries: B3LYP/ZORA-TZVP(Fe, N, C)-ZORA-SVP(H)-RIJ-COSX, COSMO continuum solvent model as implemented in ORCA with epsilon set to 4.0, The reaction profile for the quintet surface was also calculated using the semi-empirical van der Waals corrections by Grimme implemented in ORCA	B3LYP	ZORA-TZVP	\	\
ACS Catal. 2019, 9, 3672−3684	ab initio: CASPT2//CASSCF/6-31G(d)/STO-3G/PCM DFT: B3LYP/CASPT2//IRC/CASSCF/PCM	B3LYP		\	\
Chem. Sci., 2023, 14, 2808	DFT: Gaussian BP86/TZVP ORCA: CASSCF/NEVPT2 def2-TZVPP(Fe)-def2-TZVP(other atoms) def2/JK	BP86	TZVP	\	\		\	\	CASSCF/NEVPT2	def2-TZVPP
Chem. Eur.J. 2020, 26, 3080 –3089	BP86-D3BJ/ZORA-TZ2P	BP86	ZORA-TZ2P	\	\
J. Am. Chem. Soc. 2018, 140, 9531−9544	BP86-GGA and B3LYP-GGA-D3BJ/CPCM/def2-TZVP (Fe)/def2-SVP; CASSCF/NEVPT2: def2-TZVP with def2-TZVP-C	BP86//B3LYP	def2-TZVP	\	\
J. Phys. Chem. A 2019, 123, 6701−6710	UM06-SMD/6-31G(d,p)-SDD (Ni)	M06	SDD	\	\
Dalton Trans., 2024, 53, 2789.	PBE/TZ2P	PBE	TZ2P	\	\
J. Am. Chem. Soc. 2023, 145, 26106−26121	DFT：PBE0-D3/def2-tzvp TDDFT: PBE0/def2-tzvp(-f)/ZORA CASSCF/DLNPO-NEVPT2	PBE0	def2-TZVP	\	\
J. Am. Chem. Soc. 2012, 134, 20352−20364	electronic structure of 1: ORCA, TPSSh/SVP(H)-TZVP(other atoms)	TPSSh	TZVP	\	\
Chem. Eur. J. 2019, 25, 16606.	ωB97XD/6-31++G(d,p)/LANL2DZ(Pd)/CPCM CASSCF：NEVPT2/CASSCF[4,3]//def2-TZVP(Pd)	ωB97XD	LANL2DZ	\	\		\	\	NEVPT2/CASSCF	def2-TZVP
Chem. Sci.,2021, 12,9398–9407	UPBEPBE-D3/def2-SVP/SMD(THF)//UB3LYP/def2-SVP(gas)	B3LYP	def2-SVP	PBE	def2-SVP
Science 2018, 362, 434−439.	SMD(CH3OH)-B3LYP-D3(BJ)/def2TZVP//B3LYP-D3(BJ)/def2-SVP	B3LYP	def2-SVP	B3LYP	def2TZVP
J. Am. Chem. Soc. 2024, 146, 30117−30125	ONIOM(B3LYP/def2-TZVP//B3LYP/6-31G*:AMBER)	B3LYP	6-31G*	B3LYP	def2-TZVP
J. Am. Chem. Soc. 2023, 145, 27626−27638	B3LYP-D3-SMD/def2-SVP//B3LYP-D3-SMD/def2-TZVP	B3LYP	def2-SVP	B3LYP	def2-TZVP
Chem 5, 1–15	B3LYP-D3/def-TZVP/SMD // B3LYP-D3/def2-SVP	B3LYP	def2-SVP	B3LYP	def2-TZVP		\	\	\	\
Chen et al., iScience 23, 100985	DFT: B3LYP-D3(BJ)/def2-TZVP/SMD(dioxane)//B3LYP-D3(BJ)/def2-SVP	B3LYP	def2-SVP	B3LYP	def2-TZVP
J. Am. Chem. Soc. 2017, 139, 3876−3888	B3LYP-D3/def2-TZVP/SMD(toluene)//B3LYP-D3/def2-SVP	B3LYP	def2-SVP	B3LYP	def2-TZVP
ACS Catal. 2019, 9, 1962−1972	UB3LYP-D3/def2-SVP//B3LYP-D3-SMD/def2-TZVP DLPNO-CCSD(T)/cc-PVDZ and cc-PVTZ	B3LYP	def2-SVP	B3LYP	def2-TZVP
J. Am. Chem. Soc. 2016, 138, 3715−3730	DFT: Gaussian B3LYP-D3/def2-TZVP/SMD//B3LYP/def2-SVP RCCSD(T)-CBS Molpro	B3LYP	def2-SVP	B3LYP	def2-TZVP
ACS Catal. 2019, 9, 6080−6086	DLPNO-CCSD(T)/DFT: Gfinal = EDLCC + ΔGthermal(UB3LYP-def2-SVP) + ΔGsolv(UB3LYP-def2-TZVP)	B3LYP	def2-SVP	B3LYP	def2-TZVP
ACS Catal. 2019, 9, 1962−1972	DLPNO-CCSD(T)/DFT: Gfinal = EDLCC + ΔGthermal(UB3LYP-def2-SVP) + ΔGsolv(UB3LYP-def2-TZVP)	B3LYP	def2-SVP	B3LYP	def2-TZVP
ACS Catal. 2023, 13, 1863−1874	B3LYP-D3/def2-TZVP/SMD//B3LYP-D3/def2-SVP CASPT2/TPSSh（calibration-sp）	B3LYP	def2-SVP	B3LYP	def2-TZVP
J. Am. Chem. Soc. 2024, 146, 24863−24870	IEFPCM(H2O)-B3LYP-D3(BJ)/def2-TZVP//B3LYP-D3(BJ)/def2-SVP	B3LYP	def2-SVP	B3LYP	def2-TZVP
JACS Au 2023, 3, 3494−3505	SMD(chlorobenzene)-B3LYP/def2-TZVP/B3LYP-D3(BJ)/def2-TZVP	B3LYP	def2-TZVP	B3LYP	def2-TZVP				CASSCF(10,13)/NEVPT2
ChemRxiv. 2022; doi:10.26434/chemrxiv-2022-2sqgf.	DFT: B3LYP-D3/6-31G(d) + LanL2DZ (Mn, Fe)//B3LYP-D3(SMD)/def2-TZVP ab initio: DLPNO-CCSD(T)/cc-PVTZ; SA-CASSCF/NEVPT2/ZORA	B3LYP	LANL2DZ	B3LYP	def2-TZVP
Inorg. Chem. 2023, 62, 14931−14941	DFT: B3LYP-D3/6-31G(d)/LanL2DZ//B3LYP-D3-SMD/def2-TZVP ab initio: CASSCF/NEVPT2	B3LYP	LANL2DZ	B3LYP	def2-TZVP
J. Org. Chem. 2020, 85, 23, 14879–14889	SMD(CH2Cl2)-B3LYP-D3/def2-TZVP//B3LYP-D3/LANL2DZ (Mn, I)//6-31G* (others)	B3LYP	LANL2DZ	B3LYP	def2-TZVP
Inorg. Chem. 2024, 63, 9809−9822	B3LYP/Lanl2TZ (Fe)/6-31G(d,p)//B3LYP/def2-TZVP	B3LYP	LANL2TZ	B3LYP	def2-TZVP	\
Catal. Sci. Technol.,2019, 9,1879–1890	DFT: B3LYP-D3/def2-TZVP/SMD(DCE)//B3LYP-D3/SDD(Co, Ag, Sb, and I)-6-31G(d,p) CASSCF: ORCA def2-TZVP with def2-TZVP/C	B3LYP	SDD	B3LYP	def2-TZVP
Catal. Sci. Technol.,2019, 9,1879–1890	B3LYP-D3/def2-TZVP/SMD(DCE)//B3LYP-D3/SDD(Co, Ag, Sb, I)-6-31G CASSCF/def2-TZVP/def2-TZVP/C ETS-NOCV: B3LYP-D3/TZ2P, The relativistic effect of the Co atom was considered by the zero-order regular approximation (ZORA).	B3LYP	SDD	B3LYP	def2-TZVP
J. Am. Chem. Soc. 2022, 144, 80−85	SMD(e=4)-B3LYP-D3(BJ)/def2-TZVP//B3LYP-D3(BJ)/SDD (Fe)/6-31G(d) (others)	B3LYP	SDD	B3LYP	def2-TZVP
Catalysis Science & Technology, 2019, 9, 1879-1890.	SMD(DCE)-B3LYP-D3/def2-TZVP//B3LYP-D3/SDD (Co, Ag, Sb, I)/6-31G(d,p) (others)	B3LYP	SDD	B3LYP	def2-TZVP				CASSCF(12, 12)
Garhwal et al., Chem Catalysis 1,1–17	ORCA 4.2.1 B3PW91**-D3(BJ)/BS2-def2-TZVP/CPCM//B3PW91** D3(BJ)/BS1-def2-TZVP(Fe)-def2-SVP(other atoms)	B3PW91**	def2-TZVP	B3PW91**	def2-TZVP
J. Am. Chem. Soc. 2011,133,12264–12273.	BP86/def2-TZVP//ri-BP86/SV(P)	BP86	SV(P)	BP86	def2-TZVP
Organometallics 2019, 38, 4105−4114	M06L-D3/def2-TZVP//B3LYP-def2-SVP	B3LYP	def2-SVP	M06L	def2-TZVP
J. Am. Chem. Soc. 2023, 145, 15611−15618.	M06L-SMD/Def2-TZVP//B3LYP-D3/6-31G(d,p)/ SDD(Co)	B3LYP	SDD	M06L	def2-TZVP
J. Am. Chem. Soc. 2023, 145, 45, 24877–24888	SMD(MeOH/DMF)-M06L-D3/def2-TZVP//M06L/def2-TZVP(Ni, N)/def2-SVP	M06L	def2-TZVP	M06L	def2-TZVP
ACS Catal. 2017, 7, 7, 4796–4804	SMD(benzene)-M06L/def2-TZVP//SMD(benzene)-M06L/LANL2DZ (Ni)/6-31G(d,p) (others)	M06L	LANL2DZ	M06L	def2-TZVP
ACS Catal. 2018, 8, 9907−9925	UM06-L/def2-TZVP/SMD(n-octane)//UM06-L/6-31G(d,p)[LANL2DZ](Mn,Fe,Co,Ni)/SMD(n-octane)	M06L	LANL2DZ	M06L	def2-TZVP
ACS Catal. 2021, 11, 14408.	M06-L/def2-TZVP//M06-L/LANL2DZ (Ni)/6-31G(d,p) (others)	M06L	LANL2DZ	M06L	def2-TZVP
Nat Catal 7, 636–645 (2024)	M06-L/def2-TZVP(SMD)// M06-L/sdd/6-31G*	M06L	SDD	M06L	def2-TZVP
Nat. Catal. 2024, https://doi.org/10.1038/s41929-024-01234-0	PBE0-D3BJ/def2-TZVP(CPCM = THF)//BP86-D3BJ/def2-SVP/def2-TZVP (Fe)	BP86	def2-TZVP	PBE0	def2-TZVP
Chem. Eur. J. 2019, 25, 16382 –16389	DFT: PW6B95-D3(BJ)/def2-TZVP/SMD(THF)//TPSS-D3(BJ)/def2-SVP	TPSS	def2-SVP	PW6B95	def2-TZVP
Journal of the American Chemical Society 2022, 144 (2), 798-806	SMD(THF)-PW6B95-D4/def2-TZVP//TPSS-D3(BJ)/def2-SVP	TPSS	def2-SVP	PW6B95	def2-TZVP
ACS Catalysis 2021, 11 (3), 1505-1515.	SMD(THF)-PW6B95-D4/def2-TZVP//TPSS-D3BJ/def2-SVP; SMD(THF)-DLNPO-CCSD(T)/def2-TZVP//TPSS-D3BJ/def2-SVP	TPSS	def2-SVP	PW6B95	def2-TZVP
J. Am. Chem. Soc. 2020, 142, 13102−13111	TPSS-D3BJ/def2-SVP//TPSS-D4-SMD/def2-TZVP	TPSS	def2-SVP	TPSS	def2-TZVP
J. Am. Chem. Soc. 2015, 137, 14196−14207	DFT: TPSS/def2-TZVP/SMD(toluene)//TPSS/def2-SVP	TPSS	def2-SVP	TPSS	def2-TZVP
ACS Catal. 2022, 12, 4947−4960	TPSS-D4/def2-TZVP+SMD(Benzene)//TPSSD3(BJ)/def2-SVP	TPSS	def2-SVP	TPSS	def2-TZVP
ACS Catal. 2017, 7, 285−292	TPSS-D3/def2-TZVP/SMD//TPSS-D3/def2-SVP	TPSS	def2-SVP	TPSS	def2-TZVP
J. Am. Chem. Soc. 2017, 139, 15564−15567	DFT: TPSS-D3/def2-TZVP/SMD(benzene)//TPSS-D3/def2-SVP CASPT2: truncated model	TPSS	def2-SVP	TPSS	def2-TZVP
J. Am. Chem. Soc. 2025, 147, 6897−6904.	SMD(THF)-TPSSh-D3(BJ)/def2-TZVP//B3LYP-D3(BJ)/def2-SVP	B3LYP	def2-SVP	TPSSh	def2-TZVP
ACS Catal. 2022, 12, 4947−4960	SMD(Benzene)-TPSS-D4/def2-TZVP// TPSS-D3(BJ)/def2SVP	TPSS	def2SVP	TPSSh	def2-TZVP
J. Phys. Chem. A 2024, 128, 4114−4127.	TPSSh-D3(BJ)/def2-TZVP/SMD//TPSSh-D3(BJ)/ def2-SVP SA-CASSCF/NEVPT2/cc-pwCVDZ-DK (Fe)/cc-pVDZ-DK and cc-pwCVTZ-DK (Fe)/cc-pVTZ-DK	TPSSh	def2-SVP	TPSSh	def2-TZVP	\
J. Phys. Chem. A 2024, 128, 4114−4127.	SMD(Benzene)-TPSSh-D3(BJ)/def2-TZVP//TPSSh-D3(BJ)/def2-SVP	TPSSh	def2-SVP	TPSSh	def2-TZVP				SA-CASSCF/NEVPT2
ACS Catal. 2020, 10, 12454−12465	UTPSSh/def2-TZVP(Fe)-6-311++G(d,p)/PCM(n-pentane)//UTPSSh/def2-TZVP(Fe)-6-311++G(d,p)-6-31G(d) CASPT2(6,6)/def2TZVP-6-311++G(d,p).	TPSSh	def2-TZVP	TPSSh	def2-TZVP
Angew.Chem. Int.Ed. 2021, 60, 10211 –10218	wB97XD/def2-TZVP/SMD//wB97XD/def2-SVP	wB97XD	def2-SVP	wB97XD	def2-TZVP
Angew. Chem. Int. Ed. 2021, 60, 10211.	SMD(THF)-wB97XD/def2-TZVP//wB97XD/def2-SVP	wB97XD	def2-SVP	wB97XD	def2-TZVP
Angew. Chem. Int. Ed. 2024, 63, e202402044	SMD(THF)-wB97XD/def2-TZVP//wB97XD/TZVP (Fe)/6-31G* (others)	wB97XD	TZVP	wB97XD	def2-TZVP
Organometallics 2021, 40, 1195−1200	ωB97X-D/def2-TZVP/SMD//ωB97X-D/def2-SVP/SMD	ωB97XD	def2-SVP	ωB97XD	def2-TZVP
ACS Catal. 2020, 10, 21, 12454–12465.)	PCM(n-pentane)-TPSSh-D3/def2-TZVP (Fe)/6-311++G(d.p)//TPSSh/def2-TZVP (Fe)/6-311++G* (reactvie site)/6-31G(d) (others)	TPSSh	def2-TZVP	TPSSh	def2-TZVP
J. Am. Chem. Soc. 2023, 145, 15742−15753	SMD(CH3CN)-M06-L-D3/def2TZVPP//SMD(CH3CN)-M06-L-D3/def2-SVP (Fe)//6-31G* (others)	M06L	def2-SVP	M06L	def2TZVPP
J. Phys. Chem. Lett. 2010, 1, 1533–1540	UDFT: B3LYP/def2-TZVPP//B3LYP/def2-SVP RCCSD(T) and explicitly correlated RCCSD(T)-F12	B3LYP	def2-SVP	B3LYP	def2-TZVPP
Inorg. Chem. 2024, 63, 14468−14481	DFT: B3LYP-D3(BJ)/def2-TZVPP//B3LYP-D3(BJ)/def2-TZVP(Fe; the first coordination sphere)-def2-SVP CASSCF/NEVPT2(The def2-TZVPP and def2-TZVPP/C correlation-fitting basis sets and B3LYP-optimized geometries)	B3LYP	def2-TZVP	B3LYP	def2-TZVPP
J. Org. Chem. 2022, 87, 6438−6443	UB3LYP-D3(BJ)/LANL2DZ (Co)/6-31G(d,p)//UB3LYP-SMD/def2-TZVPP	B3LYP	LANL2DZ	B3LYP	def2-TZVPP
J. Org. Chem. 2022, 87, 9, 6438–6443	SMD(dichloromethane)-B3LYP-D3(BJ)/def2-TZVPP//B3LYP-D3(BJ)/LANL2DZ (Co)/6-31G(d,p) (others)	B3LYP	LANL2DZ	B3LYP	def2-TZVPP
Inorg. Chem. 2023, 62, 14261−14278.	UB3LYP-D3BJ-CPCM/TZVP (Fe, N, O) + 6-31G(d,p) (C, H)//UB3LYP/def2-TZVPP	B3LYP	TZVP	B3LYP	def2-TZVPP
Dalton Trans.,2023, 52,18247–18256	B3LYP-D3(BJ)-CPCM/TZVP (Mn, N, O)/6-31G(d,p) (C, H)//B3LYP-D3(BJ)-CPCM/def2-TZVPP	B3LYP	TZVP	B3LYP	def2-TZVPP
ACS Catal. 2013, 3, 1334−1341	UB3LYP-D2/B2-def2-TZVPP/PCM//B1-TZVP(Fe, N, O)-6-31G(d,p)(C, H)/PCM computational level (including ZPE and solvation corrections).	B3LYP	TZVP	B3LYP	def2-TZVPP
ACS Catal. 2022, 12, 13215−13224	M06(SMD-THF)/BAS2-def2-TZVPP//PBE0-D3(SMD-THF)/BS1-def2-TZVP(Ir,Ni,Br)-def2-SVP(H,C,N,O,Cl); multireference calculations	PBE0	def2-TZVP	M06	def2-TZVPP
J. Am. Chem. Soc. 2023, 145, 11978−11987	DFT: M06L/B2-def2-TZVPP/SMD//M06L/B1-def2-SVP/GP	M06L	def2-SVP	M06L	def2-TZVPP
J. Am. Chem. Soc. 2023, 145, 23385−23394	B3LYP-D3/SDD (Ni, Br)/6-31G(d)//TPSS-D3(BJ)-SMD/def2-TZVPP	B3LYP	SDD	TPSS	def2-TZVPP
JACS Au 2022, 2, 1899−1909	ORCA: TPSSh/def2-TZVPP//PBE-D3BJ/def2-TZVP(first coordination sphere)-def2-SVP(others)/CPCM(THF)	PBE	def2-TZVP	TPSSh	def2-TZVPP
JACS Au 2022, 2, 1899−1909	ORCA TPSSh/def2-TZVPP//PBE-D3(BJ)/def2-TZVP(first coordination)-def2-SVP/CPCM(THF)	PBE	def2-TZVP	TPSSh	def2-TZVPP
J. Am. Chem. Soc. 2024, 146, 30637−30652	SMD(Benzene)-TPSSh-D4/def2-TZVPP//TPSS-D4/def2-TZVP (Fe)/def2-SVP (others)	TPSS	def2-TZVP	TPSSh	def2-TZVPP
J. Am. Chem. Soc. 2024, 146, 9947−9956	CPCM(Benzen)-TPSSh-D3(BJ)/def2-TZVPP//TPSSh-D3(BJ)/def2-TZVP	TPSSh	def2-TZVP	TPSSh	def2-TZVPP
J. Am. Chem. Soc. 2024, 146, 16, 11418–11431	SMD(THF)-wB97M-V/def2-TZVPP//SMD(THF)-PBE0-D3(BJ)/def2-SVP	PBE0	def2-SVP	wB97M-V	def2-TZVPP
J.Am.Chem.Soc.2022,144,2735−2746	ωB97X-D/def2-SVP–def2-TZVPP(Ag)//ωB97X-D/def2-TZVPP, SMD(DCM)	wB97XD	def2-TZVPP	wB97XD	def2-TZVPP
Chem. Eur. J. 2024, 30, e202403437.	CPCM(THF)-wB97XD/def2-TZVPP//wB97XD/TZVP (Fe)/6-31G* (others)	wB97XD	TZVP	wB97XD	def2-TZVPP
Chem 2023, 9, 3623.	SMD(MTBE)-w-B97XD/def2-TZVPP/SMD//w-B97XD/def2-SVP	w-B97XD	def2-SVP	w-B97XD	def2-TZVPP
NATURE COMMUNICATIONS (2018) 9:221	ωB97XD/def2-TZVPP/CPCM(toluene)//ωB97XD/TZVP(Fe)-6-31G(d)(H,C,N and Si). For selected key steps of energy profile were checked by M06/def2-TZVPP/SMD solvation correction at single point energy calculations.	ωB97XD	TZVP	ωB97XD	def2-TZVPP
J. Am. Chem. Soc. 2020, 142, 16894−16902	ωB97XD/def2-TZVPP/CPCM//ωB97XD/6-31G*/TZVP	ωB97XD	TZVP	ωB97XD	def2-TZVPP
J. Am. Chem. Soc. 2022, 144, 515−526	ωB97XD/def2-TZVPP/CPCM//ωB97XD/6-31G*/TZVP	ωB97XD	TZVP	ωB97XD	def2-TZVPP
Natl Sci. Rev. 11, nwad324 (2024).	ωB97XD/def2-TZVPP/CPCM//ωB97XD/6-31G*/TZVP	ωB97XD	TZVP	ωB97XD	def2-TZVPP
J. Am. Chem. Soc. 2024, 146, 9947−9956	TPSSh-D3BJ/def2-TZVP//TPSSh/ DKH-def2-TZVPP	TPSSh	def2-TZVP	TPSSh	DKH-def2-TZVPP	sp
J. Am. Chem. Soc. 2002, 124, 37, 11056–11063	COSMO(CH3CN)-B3LYP/LACV3P**//B3LYP/LACVP	B3LYP	LACVP	B3LYP	LACV3P**
J. Am. Chem. Soc. 2021, 143, 42, 17793–17805	TPSS/LACV3P**+//TPSS/LACVP**	TPSS	LACVP**	TPSS	LACV3P**+
Chem. Sci., 2011, 2, 1039–1045	DFT: B3LYP/LACV3P*+//B3LYP/LACVP level using Gaussian 09	B3LYP	LACVP	B3LYP	LACV3P*+	\
J. Am. Chem. Soc. 2012, 134, 20222−20225	DFT: B3LYP/LACV3P*+//LACVP level including CPCM solvation.	B3LYP	LACVP	B3LYP	LACV3P*+	\
J. Phys. Chem. Lett. 2012, 3, 2851−2856	B3LYP/LACV3P*+//LACVP level, with solvent (acetonitrile) effects included as a dielectric medium through the CPCM scheme, even in the geometry optimization steps to avoid self-interaction errors	B3LYP	LACVP	B3LYP	LACV3P*+	\
Chem. Commun., 2014, 50, 5572--5575	DFT: B3LYP/LACV3P*+//B3LYP/LACVP	B3LYP	LACVP	B3LYP	LACV3P*+	\
J. Am. Chem. Soc. 2013, 135, 17090−17104	UB3LYP-D3/B2-LACV3P+*(Fe,K)/solve/6-311+G*(rest)//UB3LYP-D3/B1-LACVP(Fe,K)/6-31G(rest), along with solvation corrections using Poisson−Boltzmann solver as implemented in Jaguar 7.6.	B3LYP	LACVP	B3LYP	LACV3P+*	\
J. Am. Chem. Soc. 2013, 135, 8838−8841	B3LYP/LACV3P*+//LACVP level including the CPCM solvation correction (trifluoroethanol) as implemented in Gaussian 09	B3LYP	LACVP	B3LYP	LACV3P+*	\
J. Am. Chem. Soc. 2000, 122, 37, 8977–8989	B3LYP/LACVP* (Fe)/6-311+G* (others)//B3LYP/LACVP (Fe)/6-31G* (others)	B3LYP	LACVP	B3LYP	LACVP*
J. Am. Chem. Soc. 2023, 145, 5739−5749.	B3LYP-CPCM/Lanl2TZ (Co)/Lanl2DZDP (I)/6-31+G(d,P)//UB3LYP-CPCM/Lanl2DZ (Co)/Lanl2DZDP (I)/6-31G(d)	B3LYP	LANL2DZ	B3LYP	LANL2TZ	\
J. Am. Chem. Soc. 2018, 140, 3929−3939	B3LYP-D3-SMD (CPCM)/LANL2TZ (Pd)/6-311++G(d,p)//B3LYP-D3/LANL2TZ (Pd)/6-31G(d,p)	B3LYP	LANL2TZ	B3LYP	LANL2TZ	\
Angew. Chem. Int. Ed. 2024, e202408745	B3LYP-D3(BJ) / 6-311+G(d,p) // LANL2DZ (F, Cl, Br, I) // LANL2TZ[F] (Cu) / SMD (Benzene)//B3LYP-D3(BJ) / 6-311+G(d,p) // LANL2DZ (Cu, F, Cl, Br, I) / SMD (Benzene)	B3LYP	LANL2DZ	B3LYP	LANL2TZ[F]	\
J. Am. Chem. Soc. 2020, 142, 15527−15535	DFT（ORCA）：PBE-D3BJ/ma-def2-TZVP(The Fe center, all atoms attached to Fe and/or conjugated with Fe (carbene ligands) and the entire butene ligand)/ma-def2-SVP(others)// B3LYP/def2-SVP. Additionally, the Fe center was treated with the DKH2 effective core potential.	B3LYP	def2-SVP	PBE	ma-def2-TZVP	sp
2021, Angew. Chem. Int. Ed. 60, 12467–12474	SMD(H2O)-B3LYP(15% HF)-D3/SDD (Fe)/6-311G(2df, 2p) (others)//B3LYP-D3/SDD (Fe)/6-31G(d,p) (others)	B3LYP	SDD	B3LYP	SDD
2024, Angew. Chem. Int. Ed. 63, e202317514	SMD(H2O)-B3LYP(15% HF)-D3/SDD (Cu)/6-311G(2df, 2p) (others)//B3LYP-D3/SDD (Cu)/6-31G(d,p) (others)	B3LYP	SDD	B3LYP	SDD
J. Am. Chem. Soc. 2024, 146, 28832	SMD(CH3CN)-B3LYP-D3/SDD (Fe, Ni)/6-311G(2df, 2p) (others)//B3LYP-D3/SDD (Cu)/6-31G(d,p) (others)	B3LYP	SDD	B3LYP	SDD
J. Am. Chem. Soc. 2018, 140, 15099−15113	DFT: Gaussian M06/SDD(Cu)-6-311++G(d,p)(C, H, O, N, Cl)/SMD//B3LYP/LANL2DZ(Cu)-6-31G(d,p)(C,H,O,N,Cl) MOLCAS 8.0: MS-CASPT2/SDD(Cu)-cc-pVTZ(C,H,Cl)/PCM//SA-CASSCF/SDD(Cu)-cc-pVDZ(C,H,Cl)	B3LYP	LANL2DZ	M06	SDD	\	SA-CASSCF	SDD	MS-CASPT2	SDD
Org. Lett. 2020, 22, 453−457	M06-SMD/SDD(Mn,Sb)-6-311++G(d,p)//B3LYP/SDD-6-31G(d,p)	B3LYP	SDD	M06	SDD
J. Am. Chem. Soc. 2023, 145, 7612−7620	SMD(MeCN)-M06-D3/SDD (Fe)/6-311+G(d,p) (others)//SMD(MeCN)-B3LYP-D3/SDD (Fe)/6-31G(d) (others)	B3LYP	SDD	M06	SDD
Nat. Synth 3, 1134–1144 (2024).	SMD(DME)-M06-D3/SDD (Co)/6-311+G(d,p) (others)//SMD(DME)-B3LYP-D3(BJ)/SDD (Co)/6-31G(d) (others)	B3LYP	SDD	M06	SDD
J. Am. Chem. Soc. 2024, 146, 24808−24817	BP86-D3BJ-CPCM-RI-SARC/J/ZORA-TZVP (Fe, Cu, O, N) + ZORA-SVP (C, H)//B3LYP-RIJCOSX-SARC/J	BP86	ZORA-TZVP	B3LYP	ZORA-TZVP	opt+sp
ACS Catal. 2014, 4, 823−832.	CPCM(Benzene)-B97D/SDD (Ru)/6-31G(d,p) (others)	B97D	SDD

## Sheet: Statistics
opt-Statistics	Percentage	Number of articles	Total number of articles
B3LYP/def2-SVP	0.136752	16	117
B3LYP/SDD	0.119658	14	117
B3LYP/LANL2DZ	0.0769231	9	117
TPSS/def2-SVP	0.0769231	9	117
B3LYP/LACVP	0.0683761	8	117
B3LYP/def2-TZVP	0.034188	4	117
TPSSh/def2-TZVP	0.034188	4	117
wB97XD/TZVP	0.034188	4	117
others	0.025641	3	117
SP-Statistics	Percentage	Number of articles	Total number of articles
B3LYP/def2-TZVP	0.179487	21	117
B3LYP/def2-TZVPP	0.0598291	7	117
M06L/def2-TZVP	0.0598291	7	117
wB97XD/def2-TZVPP	0.0598291	7	117
B3LYP/LACVP*+	0.0512821	6	117
TPSSh/def2-TZVP	0.0512821	6	117
TPSS/def2-TZVP	0.042735	5	117
wB97XD/def2-TZVP	0.034188	4	117
M06/SDD	0.034188	4	117
others	0.025641	3	117
